# Supplementary material for: Sex and limb impact biomechanics associated with risk of injury during drop landing with body borne load
Source: PubMed Central journal article supplement (PMC6364912; doi:10.1371/journal.pone.0211129), 2019-02-06
Supplement: pone.0211129.s001.pdf [file pone.0211129.s001.pdf]

**S1 Table:** Peak vGRF (BW), GRF<sub>mag</sub> (BW) and GRF<sub>ang</sub> (°) between normal (NL) and flexed (FL) drop landings.

|                          |           | <b>Mean</b> | <b>Min</b> | <b>Max</b> | <b>95% Confidence Interval</b> | <b><i>p</i> – value<br/>Main Effect (Land)</b> |
|--------------------------|-----------|-------------|------------|------------|--------------------------------|------------------------------------------------|
| <b>Peak vGRF</b>         | <b>NL</b> | 2.16        | 1.41       | 3.04       | 2.07 – 2.24                    | < 0.001                                        |
|                          | <b>FL</b> | 1.81        | 1.28       | 2.48       | 1.75 – 1.87                    |                                                |
| <b>GRF<sub>mag</sub></b> | <b>NL</b> | 2.16        | 1.38       | 3.07       | 2.08 – 2.25                    | < 0.001                                        |
|                          | <b>FL</b> | 1.84        | 1.28       | 2.52       | 1.78 – 1.91                    |                                                |
| <b>GRF<sub>ang</sub></b> | <b>NL</b> | -6.09       | -10.27     | 1.83       | -6.63 – -5.54                  | < 0.001                                        |
|                          | <b>FL</b> | -6.70       | -11.03     | 0.73       | -7.23 – -6.17                  |                                                |

vGRF = vertical ground reaction force, GRF<sub>mag</sub> = ground reaction force magnitude, GRF<sub>ang</sub> = ground reaction force angle
