# Supplementary material for: Sex and limb impact biomechanics associated with risk of injury during drop landing with body borne load
Source: PubMed Central journal article supplement (PMC6364912; doi:10.1371/journal.pone.0211129), 2019-02-06
Supplement: pone.0211129.s002.pdf [file pone.0211129.s002.pdf]

**S2 Table:** Joint range of motion (°) between normal (NL) and flexed (FL) drop landings.

|                       |           | <b>Mean</b> | <b>Min</b> | <b>Max</b> | <b>95% Confidence Interval</b> | <b><i>p</i> - value<br/>Main Effect (Land)</b> |
|-----------------------|-----------|-------------|------------|------------|--------------------------------|------------------------------------------------|
| <b>Hip Flexion</b>    | <b>NL</b> | 30.36       | 7.03       | 50.11      | 27.23 – 33.48                  | < 0.001                                        |
|                       | <b>FL</b> | 52.18       | 31.33      | 66.32      | 49.66 – 54.69                  |                                                |
| <b>Hip Adduction</b>  | <b>NL</b> | 3.14        | 0.00       | 11.58      | 2.63 – 3.66                    | < 0.001                                        |
|                       | <b>FL</b> | 2.44        | 0.00       | 10.90      | 1.92 – 2.95                    |                                                |
| <b>Knee Flexion</b>   | <b>NL</b> | 55.88       | 18.14      | 76.01      | 52.65 – 59.11                  | < 0.001                                        |
|                       | <b>FL</b> | 73.92       | 33.20      | 96.58      | 70.57 – 77.26                  |                                                |
| <b>Knee Abduction</b> | <b>NL</b> | 1.69        | 0.05       | 7.50       | 1.34 – 2.03                    | < 0.001                                        |
|                       | <b>FL</b> | 1.09        | 0.00       | 6.02       | 0.78 – 1.41                    |                                                |
