# Supplementary material for: Sex and limb impact biomechanics associated with risk of injury during drop landing with body borne load
Source: PubMed Central journal article supplement (PMC6364912; doi:10.1371/journal.pone.0211129), 2019-02-06
Supplement: pone.0211129.s003.pdf [file pone.0211129.s003.pdf]

**S3 Table:** Peak joint moments (N·m/kg·m) between normal (NL) and flexed (FL) drop landings.

|                           |           | <b>Mean</b> | <b>Min</b> | <b>Max</b> | <b>95% Confidence Interval</b> | <b><i>p</i> - value<br/>Main Effect (Land)</b> |
|---------------------------|-----------|-------------|------------|------------|--------------------------------|------------------------------------------------|
| <b>Hip Flexion (-)</b>    | <b>NL</b> | -0.77       | -2.13      | -0.21      | -0.86 – -0.69                  | < 0.001                                        |
|                           | <b>FL</b> | -1.02       | -2.12      | -0.62      | -1.09 – -0.95                  |                                                |
| <b>Hip Adduction (-)</b>  | <b>NL</b> | 0.09        | -0.12      | 0.35       | 0.06 – 0.12                    | < 0.001                                        |
|                           | <b>FL</b> | 0.16        | -0.04      | 0.71       | 0.12 – 0.21                    |                                                |
| <b>Knee Flexion (+)</b>   | <b>NL</b> | 1.45        | 0.92       | 1.99       | 1.38 – 1.51                    | < 0.001                                        |
|                           | <b>FL</b> | 1.32        | 0.89       | 1.83       | 1.26 – 1.38                    |                                                |
| <b>Knee Abduction (+)</b> | <b>NL</b> | 0.13        | 0.01       | 0.37       | 0.11 – 0.15                    | < 0.001                                        |
|                           | <b>FL</b> | 0.11        | 0.01       | 0.31       | 0.10 – 0.13                    |                                                |
