# Supplementary material for: Sex and limb impact biomechanics associated with risk of injury during drop landing with body borne load
Source: PubMed Central journal article supplement (PMC6364912; doi:10.1371/journal.pone.0211129), 2019-02-06
Supplement: pone.0211129.s004.pdf [file pone.0211129.s004.pdf]

**S4 Table:** Peak vGRF (BW), GRF<sub>mag</sub> (BW) and GRF<sub>ang</sub> (°) between sexes during normal (NL) and flexed (FL) drop landings.

|                          |           | Female |        |       |                         | Male  |       |      |                         | <i>p</i> - value |         |
|--------------------------|-----------|--------|--------|-------|-------------------------|-------|-------|------|-------------------------|------------------|---------|
|                          |           | Mean   | Min    | Max   | 95% Confidence Interval | Mean  | Min   | Max  | 95% Confidence Interval | Main Effect Sex  | Land    |
| <b>Peak vGRF</b>         | <b>NL</b> | 2.15   | 1.55   | 2.91  | 2.02 – 2.29             | 2.16  | 1.48  | 2.89 | 2.06 – 2.26             | 0.17             | < 0.001 |
|                          | <b>FL</b> | 1.90   | 1.34   | 2.48  | 1.81 – 2.00             | 1.71  | 1.34  | 2.25 | 1.64 – 1.79             |                  |         |
| <b>GRF<sub>mag</sub></b> | <b>NL</b> | 2.15   | 1.53   | 2.89  | 2.01 – 2.30             | 2.17  | 1.43  | 2.97 | 2.07 – 2.28             | 0.21             | < 0.001 |
|                          | <b>FL</b> | 1.94   | 1.36   | 2.52  | 1.84 – 2.04             | 1.75  | 1.36  | 2.27 | 1.67 – 1.83             |                  |         |
| <b>GRF<sub>ang</sub></b> | <b>NL</b> | -6.58  | -10.02 | -2.09 | -7.45 – -5.71           | -5.60 | -9.07 | 1.05 | -6.26 – -4.94           | 0.05             | < 0.001 |
|                          | <b>FL</b> | -7.24  | -10.57 | -3.31 | -8.09 – -6.39           | -6.16 | -9.59 | 0.52 | -6.81 – -5.52           |                  |         |

vGRF = vertical ground reaction force, GRF<sub>mag</sub> = ground reaction force magnitude, GRF<sub>ang</sub> = ground reaction force angle
