# Supplementary material for: Sex and limb impact biomechanics associated with risk of injury during drop landing with body borne load
Source: PubMed Central journal article supplement (PMC6364912; doi:10.1371/journal.pone.0211129), 2019-02-06
Supplement: pone.0211129.s005.pdf [file pone.0211129.s005.pdf]

**S5 Table:** Joint range of motion (°) between sexes during normal (NL) and flexed (FL) drop landings.

|                       |    | Female |       |       |                         | Male  |       |       |                         | <i>p</i> - value |         |
|-----------------------|----|--------|-------|-------|-------------------------|-------|-------|-------|-------------------------|------------------|---------|
|                       |    | Mean   | Min   | Max   | 95% Confidence Interval | Mean  | Min   | Max   | 95% Confidence Interval | Main Effect Sex  | Land    |
| <b>Hip Flexion</b>    | NL | 34.32  | 15.41 | 47.84 | 29.33 – 39.31           | 26.39 | 7.44  | 48.43 | 22.62 – 30.16           | 0.17             | < 0.001 |
|                       | FL | 51.21  | 32.93 | 64.49 | 47.20 – 55.22           | 53.15 | 35.67 | 65.99 | 50.12 – 56.18           |                  |         |
| <b>Hip Adduction</b>  | NL | 3.97   | 0.33  | 11.58 | 3.15 – 4.80             | 2.31  | 0.00  | 7.71  | 1.69 – 2.93             | < 0.01           | < 0.001 |
|                       | FL | 3.30   | 0.07  | 10.82 | 2.48 – 4.12             | 1.57  | 0.00  | 7.22  | 0.96 – 2.19             |                  |         |
| <b>Knee Flexion</b>   | NL | 57.23  | 21.18 | 74.77 | 52.09 – 62.38           | 54.53 | 26.03 | 73.90 | 50.64 – 58.42           | 0.54             | < 0.001 |
|                       | FL | 70.85  | 33.20 | 88.95 | 65.52 – 76.19           | 76.99 | 57.63 | 95.02 | 72.95 – 81.02           |                  |         |
| <b>Knee Abduction</b> | NL | 1.83   | 0.05  | 7.22  | 1.28 – 2.38             | 1.55  | 0.09  | 5.56  | 1.13 – 1.97             | 0.33             | < 0.001 |
|                       | FL | 1.26   | 0.00  | 5.72  | 0.76 – 1.76             | 0.92  | 0.00  | 5.08  | 0.55 – 1.30             |                  |         |
