# Supplementary material for: Sex and limb impact biomechanics associated with risk of injury during drop landing with body borne load
Source: PubMed Central journal article supplement (PMC6364912; doi:10.1371/journal.pone.0211129), 2019-02-06
Supplement: pone.0211129.s006.pdf [file pone.0211129.s006.pdf]

**S6 Table:** Peak joint moments (N·m/kg·m) between sexes during normal (NL) and flexed (FL) drop landings.

|                           |    | Female |       |       |                         | Male  |       |       |                         | <i>p</i> - value |         |
|---------------------------|----|--------|-------|-------|-------------------------|-------|-------|-------|-------------------------|------------------|---------|
|                           |    | Mean   | Min   | Max   | 95% Confidence Interval | Mean  | Min   | Max   | 95% Confidence Interval | Main Effect      |         |
|                           |    |        |       |       |                         |       |       |       |                         | Sex              | Land    |
| <b>Hip Flexion (-)</b>    | NL | -0.77  | -1.24 | -0.49 | -0.91 – -0.63           | -0.77 | -2.06 | -0.21 | -0.88 – -0.67           | 0.30             | < 0.001 |
|                           | FL | -0.94  | -1.32 | -0.65 | -1.05 – -0.83           | -1.09 | -2.11 | -0.71 | -1.18 – -1.01           |                  |         |
| <b>Hip Adduction (-)</b>  | NL | 0.07   | -0.07 | 0.23  | 0.03 – 0.12             | 0.11  | -0.09 | 0.35  | 0.08 – 0.14             | 0.08             | < 0.001 |
|                           | FL | 0.12   | -0.02 | 0.37  | 0.05 – 0.19             | 0.20  | -0.02 | 0.70  | 0.15 – 0.26             |                  |         |
| <b>Knee Flexion (+)</b>   | NL | 1.49   | 1.01  | 1.92  | 1.39 – 1.59             | 1.40  | 1.00  | 1.91  | 1.33 – 1.48             | 0.10             | < 0.001 |
|                           | FL | 1.37   | 1.01  | 1.83  | 1.28 – 1.46             | 1.27  | 0.89  | 1.66  | 1.20 – 1.34             |                  |         |
| <b>Knee Abduction (+)</b> | NL | 0.15   | 0.04  | 0.34  | 0.13 – 0.18             | 0.10  | 0.01  | 0.29  | 0.08 – 0.12             | 0.01             | < 0.001 |
|                           | FL | 0.13   | 0.03  | 0.31  | 0.11 – 0.16             | 0.09  | 0.02  | 0.24  | 0.08 – 0.11             |                  |         |
