# Supplementary material for: Sex and limb impact biomechanics associated with risk of injury during drop landing with body borne load
Source: PubMed Central journal article supplement (PMC6364912; doi:10.1371/journal.pone.0211129), 2019-02-06
Supplement: pone.0211129.s007.pdf [file pone.0211129.s007.pdf]

**S7 Table:** Peak vGRF (BW), GRF<sub>mag</sub> (BW) and GRF<sub>ang</sub> (°) between limbs during normal (NL) and flexed (FL) drop landings.

|                          |    | Dominant       |        |       |               | Non-Dominant   |       |      |               | <i>p</i> - value |         |
|--------------------------|----|----------------|--------|-------|---------------|----------------|-------|------|---------------|------------------|---------|
|                          |    | 95% Confidence |        |       |               | 95% Confidence |       |      |               | Main Effect      |         |
|                          |    | Mean           | Min    | Max   | Interval      | Mean           | Min   | Max  | Interval      | Limb             | Land    |
| <b>Peak vGRF</b>         | NL | 2.29           | 1.52   | 3.18  | 2.19 – 2.40   | 2.02           | 1.30  | 2.89 | 1.92 – 2.13   | < 0.01           | < 0.001 |
|                          | FL | 1.85           | 1.34   | 2.55  | 1.77 – 1.94   | 1.71           | 1.21  | 2.41 | 1.62 – 1.80   |                  |         |
| <b>GRF<sub>mag</sub></b> | NL | 2.31           | 1.54   | 3.18  | 2.20 – 2.42   | 2.02           | 1.22  | 2.95 | 1.91 – 2.13   | < 0.01           | < 0.001 |
|                          | FL | 1.89           | 1.35   | 2.59  | 1.80 – 1.98   | 1.75           | 1.22  | 2.46 | 1.66 – 1.84   |                  |         |
| <b>GRF<sub>ang</sub></b> | NL | -6.59          | -11.14 | 0.48  | -7.27 – -5.91 | -5.32          | -9.39 | 3.19 | -8.03 – -6.62 | < 0.001          | < 0.001 |
|                          | FL | -7.32          | -12.42 | -0.04 | -5.92 – -4.72 | -5.78          | -9.63 | 1.51 | -6.40 – -5.17 |                  |         |

vGRF = vertical ground reaction force, GRF<sub>mag</sub> = ground reaction force magnitude, GRF<sub>ang</sub> = ground reaction force angle
