# Supplementary material for: Sex and limb impact biomechanics associated with risk of injury during drop landing with body borne load
Source: PubMed Central journal article supplement (PMC6364912; doi:10.1371/journal.pone.0211129), 2019-02-06
Supplement: pone.0211129.s008.pdf [file pone.0211129.s008.pdf]

**S8 Table:** Joint range of motion (°) between limbs during normal (NL) and flexed (FL) drop landings.

|                  |           | <b>Dominant</b> |            |            |                                | <b>Non-Dominant</b> |            |            |                                | <b><i>p</i> - value</b> |             |
|------------------|-----------|-----------------|------------|------------|--------------------------------|---------------------|------------|------------|--------------------------------|-------------------------|-------------|
|                  |           | <b>Mean</b>     | <b>Min</b> | <b>Max</b> | <b>95% Confidence Interval</b> | <b>Mean</b>         | <b>Min</b> | <b>Max</b> | <b>95% Confidence Interval</b> | <b>Main Effect</b>      |             |
|                  |           |                 |            |            |                                |                     |            |            |                                | <b>Limb</b>             | <b>Land</b> |
| <b>Hip</b>       | <b>NL</b> | 30.88           | 8.60       | 51.92      | 27.46 – 34.30                  | 27.67               | 5.47       | 48.30      | 24.29 – 31.05                  | < 0.01                  | < 0.001     |
| <b>Flexion</b>   | <b>FL</b> | 53.95           | 32.65      | 68.46      | 51.32 – 56.58                  | 50.93               | 30.01      | 64.17      | 48.40 – 53.47                  |                         |             |
| <b>Hip</b>       | <b>NL</b> | 3.45            | 0.00       | 11.09      | 2.69 – 4.21                    | 2.37                | 0.00       | 12.06      | 1.58 – 3.17                    | 0.13                    | < 0.001     |
| <b>Adduction</b> | <b>FL</b> | 2.45            | 0.00       | 9.70       | 1.76 – 3.13                    | 1.96                | 0.00       | 12.09      | 1.09 – 2.83                    |                         |             |
| <b>Knee</b>      | <b>NL</b> | 59.44           | 28.54      | 79.16      | 55.98 – 62.89                  | 51.59               | 7.74       | 72.86      | 47.69 – 55.49                  | 0.01                    | < 0.001     |
| <b>Flexion</b>   | <b>FL</b> | 75.28           | 31.94      | 96.25      | 71.68 – 78.89                  | 74.44               | 34.46      | 96.91      | 70.64 – 78.24                  |                         |             |
| <b>Knee</b>      | <b>NL</b> | 1.09            | 0.00       | 7.11       | 0.71 – 1.47                    | 2.21                | 0.09       | 7.90       | 1.76 – 2.66                    | < 0.01                  | < 0.001     |
| <b>Abduction</b> | <b>FL</b> | 0.86            | 0.00       | 5.69       | 0.56 – 1.15                    | 1.24                | 0.00       | 6.34       | 0.80 – 1.68                    |                         |             |
