# Supplementary material for: Sex and limb impact biomechanics associated with risk of injury during drop landing with body borne load
Source: PubMed Central journal article supplement (PMC6364912; doi:10.1371/journal.pone.0211129), 2019-02-06
Supplement: pone.0211129.s009.pdf [file pone.0211129.s009.pdf]

**S9 Table:** Peak joint moments (N·m/kg·m) between limbs during normal (NL) and flexed (FL) drop landings.

|                           |           | <b>Dominant</b> |            |            |                                | <b>Non-Dominant</b> |            |            |                                | <i>p</i> - value   |             |
|---------------------------|-----------|-----------------|------------|------------|--------------------------------|---------------------|------------|------------|--------------------------------|--------------------|-------------|
|                           |           | <b>Mean</b>     | <b>Min</b> | <b>Max</b> | <b>95% Confidence Interval</b> | <b>Mean</b>         | <b>Min</b> | <b>Max</b> | <b>95% Confidence Interval</b> | <b>Main Effect</b> |             |
|                           |           |                 |            |            |                                |                     |            |            |                                | <b>Limb</b>        | <b>Land</b> |
| <b>Hip Flexion (-)</b>    | <b>NL</b> | -0.77           | -1.84      | -0.09      | -0.86 – -0.67                  | -0.78               | -2.42      | -0.33      | -0.91 – -0.66                  | 0.78               | < 0.001     |
|                           | <b>FL</b> | -1.03           | -1.77      | -0.59      | -1.10 – -0.96                  | -1.05               | -2.47      | -0.66      | -1.16 – -0.94                  |                    |             |
| <b>Hip Adduction (-)</b>  | <b>NL</b> | 0.07            | -0.12      | 0.27       | 0.05 – 0.10                    | 0.12                | -0.12      | 0.43       | 0.09 – 0.15                    | 0.01               | < 0.001     |
|                           | <b>FL</b> | 0.15            | -0.05      | 0.63       | 0.11 – 0.20                    | 0.19                | -0.04      | 0.79       | 0.14 – 0.24                    |                    |             |
| <b>Knee Flexion (+)</b>   | <b>NL</b> | 1.50            | 0.98       | 2.03       | 1.43 – 1.57                    | 1.38                | 0.87       | 1.94       | 1.30 – 1.45                    | 0.01               | < 0.001     |
|                           | <b>FL</b> | 1.34            | 0.89       | 1.92       | 1.27 – 1.42                    | 1.27                | 0.89       | 1.74       | 1.21 – 1.32                    |                    |             |
| <b>Knee Abduction (+)</b> | <b>NL</b> | 0.09            | -0.01      | 0.34       | 0.07 – 0.11                    | 0.15                | 0.02       | 0.39       | 0.13 – 0.18                    | < 0.001            | < 0.001     |
|                           | <b>FL</b> | 0.08            | 0.00       | 0.31       | 0.07 – 0.10                    | 0.13                | 0.02       | 0.31       | 0.11 – 0.15                    |                    |             |
